# Supplementary material for: Behavioral self-regulation for weight loss in young adults: a randomized controlled trial
Source: Springer Nature journal article supplement (doi:10.1186/1479-5868-6-10), 2009-01-01
Supplement: 12966_2008_223_MOESM1_ESM.pdf [file 12966_2008_223_MOESM1_ESM.pdf]

119 Respondents screened

49 Ineligible  
3 >5% weight loss  
11 Age > 35  
1 Age < 21  
8 BMI < 27  
16 BMI > 40  
5 Schedule conflict  
3 Medical reason  
2 Reason not noted

70 Invited to orientation

20 Did not attend or declined participation

50 Scheduled for assessment

7 Did not attend assessment  
2 Ineligible due to depression  
1 Became pregnant

40 Underwent randomization

21 Assigned to BSR

19 Assigned to SBT

20 Completed 10-wk

17 Completed 10-wk

17 Completed 20-wk

17 Completed 20-wk
