# Supplementary material for: Behavioral self-regulation for weight loss in young adults: a randomized controlled trial
Source: Springer Nature journal article supplement (doi:10.1186/1479-5868-6-10), 2009-01-01

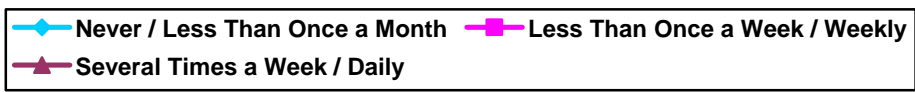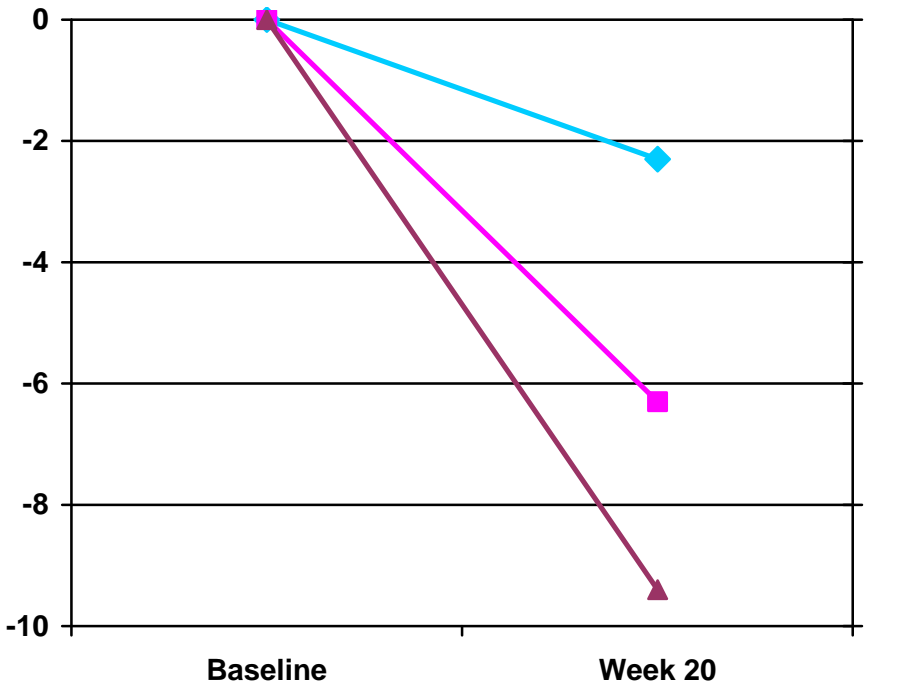

Supplement: 12966_2008_223_MOESM3_ESM.pdf [file 12966_2008_223_MOESM3_ESM.pdf]
